# Supplementary material
Source: PubMed Central journal article supplement (PMC10602419)

# Supporting Information

## Extrachromosomal Telomeres Derived from Excessive Strand Displacements

Junyeop Lee<sup>1</sup>, Jina Lee<sup>1,2</sup>, Eric J. Sohn<sup>1</sup>, Angelo Taglialatela<sup>3</sup>, Roderick J. O'Sullivan<sup>4</sup>,  
Alberto Ciccia<sup>1,3,5</sup>, and Jaewon Min<sup>1,2,5</sup>. \*

<sup>1</sup>Institute for Cancer Genetics, Columbia University Vagelos College of Physicians and Surgeons, New York, NY, USA

<sup>2</sup>Department of Pathology and Cell Biology, Columbia University Vagelos College of Physicians and Surgeons, New York, NY, USA

<sup>3</sup>Department of Genetics and Development, Columbia University Vagelos College of Physicians and Surgeons, New York, NY, USA

<sup>4</sup>Department of Pharmacology and Chemical Biology, UPMC Hillman Cancer Center, University of Pittsburgh, Pittsburgh, PA, USA

<sup>5</sup>Herbert Irving Comprehensive Cancer Center, Columbia University Vagelos College of Physicians and Surgeons, New York, NY, USA

\*Correspondence to: [JM5092@cumc.columbia.edu](mailto:JM5092@cumc.columbia.edu)

**Figure S1, related to Figure 1. 4SET assay, a simple and efficient method for detecting single-stranded extrachromosomal telomeric DNA.** (A) Comparison of genomic DNA purification between DNeasy Blood & Tissue Kit (Qiagen, 69504) and our 4SET method in U2OS and Saos2 cells. (B) Comparison between Dig-labeled strand-specific probes and standard end-labeling probes. (C) Comparison of 4SET results with DNA dissolved at 4°C overnight vs 55°C for 2 hours, followed by 4°C overnight. Observed smear signals potentially indicate the presence of nicked or gapped DNA. The graph to the right displays the quantified signals potentially indicative of nicked or gapped DNA (mean  $\pm$  SD; unpaired t-test). (D) Western blot analysis of the whole, chromatin (Chr.), and soluble using anti-Histone H3, Lamin A/C, Emerin, GAPDH, and beta-actin for the validation of cell fractions. (E) SYBR DNA images for G-rich probe and C-rich probe gels in Fig. 1C. (F) Western blot analysis of the whole, chromatin (Chr.), and soluble fractions using PML antibody. (G) Western blot analysis of Saos2 Wild-type and PML Knock-out cells using PML antibody, along with a Ponceau image as a loading control. (H) 4SET assay for SaoS2 Wild-type and PML Knock-out cells after fractionation into Whole and soluble fractions. G-rich probe was used to detect C-rich telomeric sequences, and C-rich probe was used to detect G-rich telomeric sequences. C-rich single stranded DNAs are indicated by an arrow. SYBR DNA staining of gel image. (I) C-circle assay using DNA in (H) (top). Quantification of C-circle assay (mean  $\pm$  SD; unpaired t-test) (bottom). (J) 4SET assay conducted using a nucleotide ladder (RiboRuler) to measure the size of C-rich single-stranded DNA in SaoS2 soluble fraction, analyzed on both 0.5% and 1% agarose gels. (K) 4SET assay for SaoS2 treated with Zeocin (100  $\mu$ g/ml), Etoposide (ETO) (10  $\mu$ M), or Camptothecin (CPT) (0.25  $\mu$ M) for 24 hrs. (L) Quantification of the C-circle assay in Fig. 1E (SaoS2 cells). Relative amount of C-circle assay products (mean  $\pm$  SD; unpaired t-test). (M) Cell fractionation using E1 and E2 buffers to separate chromatin, nucleoplasm, and cytoplasm. (N) Western blot analysis conducted using the fractionated DNAs in (M) using anti-Histone H3, Lamin A/C, GAPDH, and PML for the validation of cell fractions. (O) 4SET assay for fractionated DNAs in (M).

**Figure S2, related to Figure 2. The presence of C-rich telomeric single-stranded DNA.** (A) S1 nuclease assay on U2OS and SaoS2 soluble DNA fractions. (B) Lambda exonuclease assay on U2OS soluble DNA fraction. (C) Telomere-FISH with TelG (G-rich) and TelC (C-rich) PNA probes for chromatin (denatured FISH) and soluble fractions (native FISH).

**Figure S3, related to Figure 3. MRE11 nuclease activity suppresses the generation of C-rich ssDNA.** (A) SYBR DNA image for G-rich probe and C-rich probe gels in Fig. 3D. (B) 4SET assay for HeLa LT cells with or without Mirin treatment. Samples were fractionated into soluble DNA fraction or whole DNA. G-rich probe was used to detect C-rich telomeric sequences, and C-rich probe was used to detect G-rich telomeric sequences. SYBR DNA image for G-probe gel. (C) 4SET assay for SaoS2 cells with Mirin, PFM01, PFM39 or mock (control) treatments. G-rich probe was used to detect C-rich telomeric sequences, and C-rich probe was used to detect G-rich telomeric sequences. C-rich single stranded DNAs are indicated by an arrow. SYBR DNA image for G-rich probe and C-rich probe gels. (D) Western blot of SaoS2 post-transfection with siLuciferase

(siLuc) or siMRE11s. **(E)** 4SET for SaoS2, with and without Mre11 treatment post siLuc or siMRE11s transfection. The graph to the right presents the quantification of relative amount of C-rich ssDNAs (mean  $\pm$  SD; unpaired t-test). **(F)** 4SET for SaoS2 WT and SaoS2 PML KO with/without Mirin treatment. **(G)** Quantification of 4SET from F, showing relative C-rich ssDNA (whole) levels (mean  $\pm$  SD). **(H)** Native IdU pulldown was conducted using IdU (3D4) antibody for Saos2 WT and Saos2 PML KO after IdU incorporation. IgG served as a negative control. Chromatin DNA was also included to control for DNA quantity. **(I)** Quantification of the native IdU-pulldown assay in H; Relative amount of nascent C-rich ssDNAs (mean  $\pm$  SD; unpaired t-test).

**Figure S4, related to Figure 4. C-rich ssDNAs are derived from lagging strand during the Okazaki fragment processing.** **(A)** Relative amount of DNA2 mRNA levels measured by quantitative-PCR in U2OS cells transfected with siRNAs targeting DNA2 or control (siLuc). **(B)** SYBR DNA images for G-rich probe and C-rich probe gels in Fig. 4C. **(C)** Relative amount of FEN1 mRNA levels measured by quantitative-PCR in U2OS cells transfected with siRNAs targeting FEN1 or control (siLuc). **(D)** Illustration depicting 5' flap processing at lagging strand telomeres by DNA2-RPA or FEN1-PCNA. **(E)** SYBR DNA images for G-rich probe and C-rich probe gels in Fig. 4E. **(F)** 4SET assay for U2OS cells with PARPi (Talazoparib), Mirin, or mock (control) treatments. G-rich probe was used to detect C-rich telomeric sequences, and C-rich probe was used to detect G-rich telomeric sequences. C-rich single stranded DNAs are indicated by an arrow. SYBR DNA images for G-rich probe and C-rich probe gels. **(G)** 4SET assay for SaoS2 cells after transfection of siRNAs targeting PRIMPOL, or control (siLuc) with or without Mirin treatment. G-rich probe was used to detect C-rich telomeric sequences. C-rich single stranded DNAs are indicated by an arrow. SYBR DNA image for G-rich probe. **(H)** 4SET assay for U2OS PRIMPOL KO cells after transfection of PRIMPOL WT, S255D, or control cDNA plasmid with or without Mirin treatment. G-rich probe was used to detect C-rich telomeric sequences, and C-rich probe was used to detect G-rich telomeric sequences. C-rich single stranded DNAs are indicated by an arrow. SYBR DNA images for G-rich probe and C-rich probe gels.

**Figure S5, related to Figure 5. ATRX suppresses the generation of C-rich ssDNAs.** **(A)** SYBR DNA images for G-rich probe and C-rich probe gels in Fig. 5D. **(B)** SYBR DNA images for G-rich probe and C-rich probe gels in Fig. 5G. **(C)** Relative amount of FANCM mRNA levels measured by quantitative-PCR in U2OS cells transfected with siRNAs targeting FANCM or control (siLuc). **(D)** Relative quantification of R-loops at telomeres using the 7p TERRA primer following DNA/RNA hybrid immunoprecipitation with the S9.6 antibody or IgG in U2OS cells transfected with siRNAs targeting FANCM or control (siLuc). **(E)** 4SET assay for U2OS cells after transfection of siRNAs targeting FANCM or control (siLuc) with Mirin treatment. G-rich probe was used to detect C-rich telomeric sequences. C-rich single stranded DNAs are indicated by an arrow. SYBR DNA image for G-rich probe gel. **(F)** Western blot analysis of U2OS RAD51AP1 KO (C1) or control. **(G)** 4SET assay for U2OS RAD51AP1 KO (C1) or control with Mirin treatment. G-rich probe was used to detect C-rich telomeric sequences, and C-rich probe was used to detect G-rich telomeric sequences. C-rich single stranded DNAs are indicated by an arrow. SYBR DNA image for G-rich probe gel. **(H)** 4SET assay for HeLa LT TERC KO or HeLa LT TERC KO cells expressing shRNA targeting ATRX gene (ATR<sub>X</sub> 590) with or without Mirin or PARPi

treatment. G-rich probe was used to detect C-rich telomeric sequences, and C-rich probe was used to detect G-rich telomeric sequences. SYBR DNA image for G-rich probe gel.

**Figure S6, related to Figure 6. CST complex-mediated priming and subsequent strand displacements by DNA polymerase delta generates C-rich ssDNAs. (A)** Relative amount of STN1 mRNA levels measured by quantitative-PCR in U2OS and SaoS2 cells expressing shRNA targeting STN1 gene or control (shNT). **(B)** SYBR DNA images for G-rich probe and C-rich probe gels in Fig. 6D. **(C)** 4SET assay for U2OS cells expressing shRNAs targeting STN1, or non-targeting (NT) control. Cells were treated with Mirin (50  $\mu$ M, 48 hr). SYBR DNA images for G-rich probe and C-rich probe gels. **(D)** SYBR DNA images for G-rich probe and C-rich probe gels in Fig. 6F. **(E)** 4SET assay for Mirin treated U2OS cells along with aphidicolin, CD437 or control. Samples were fractionated into soluble DNA fraction or whole DNA. G-rich probe was used to detect C-rich telomeric sequences, and C-rich probe was used to detect G-rich telomeric sequences. C-rich single stranded DNAs are indicated by an arrow. SYBR DNA image for G-rich probe gel. **(F)** 4SET assay for Mirin treated U2OS WT or BLM KO cells. G-rich probe was used to detect C-rich telomeric sequences, and C-rich probe was used to detect G-rich telomeric sequences. C-rich single stranded DNAs are indicated by an arrow. SYBR DNA image for G-rich probe gel. **(G)** Quantification of the 4SET assay in F; as the relative amount of C-rich ssDNA (whole). (mean  $\pm$  SD; unpaired t-test). **(H)** SYBR DNA images for G-rich probe and C-rich probe gels in Fig. 6G.



Figure S1

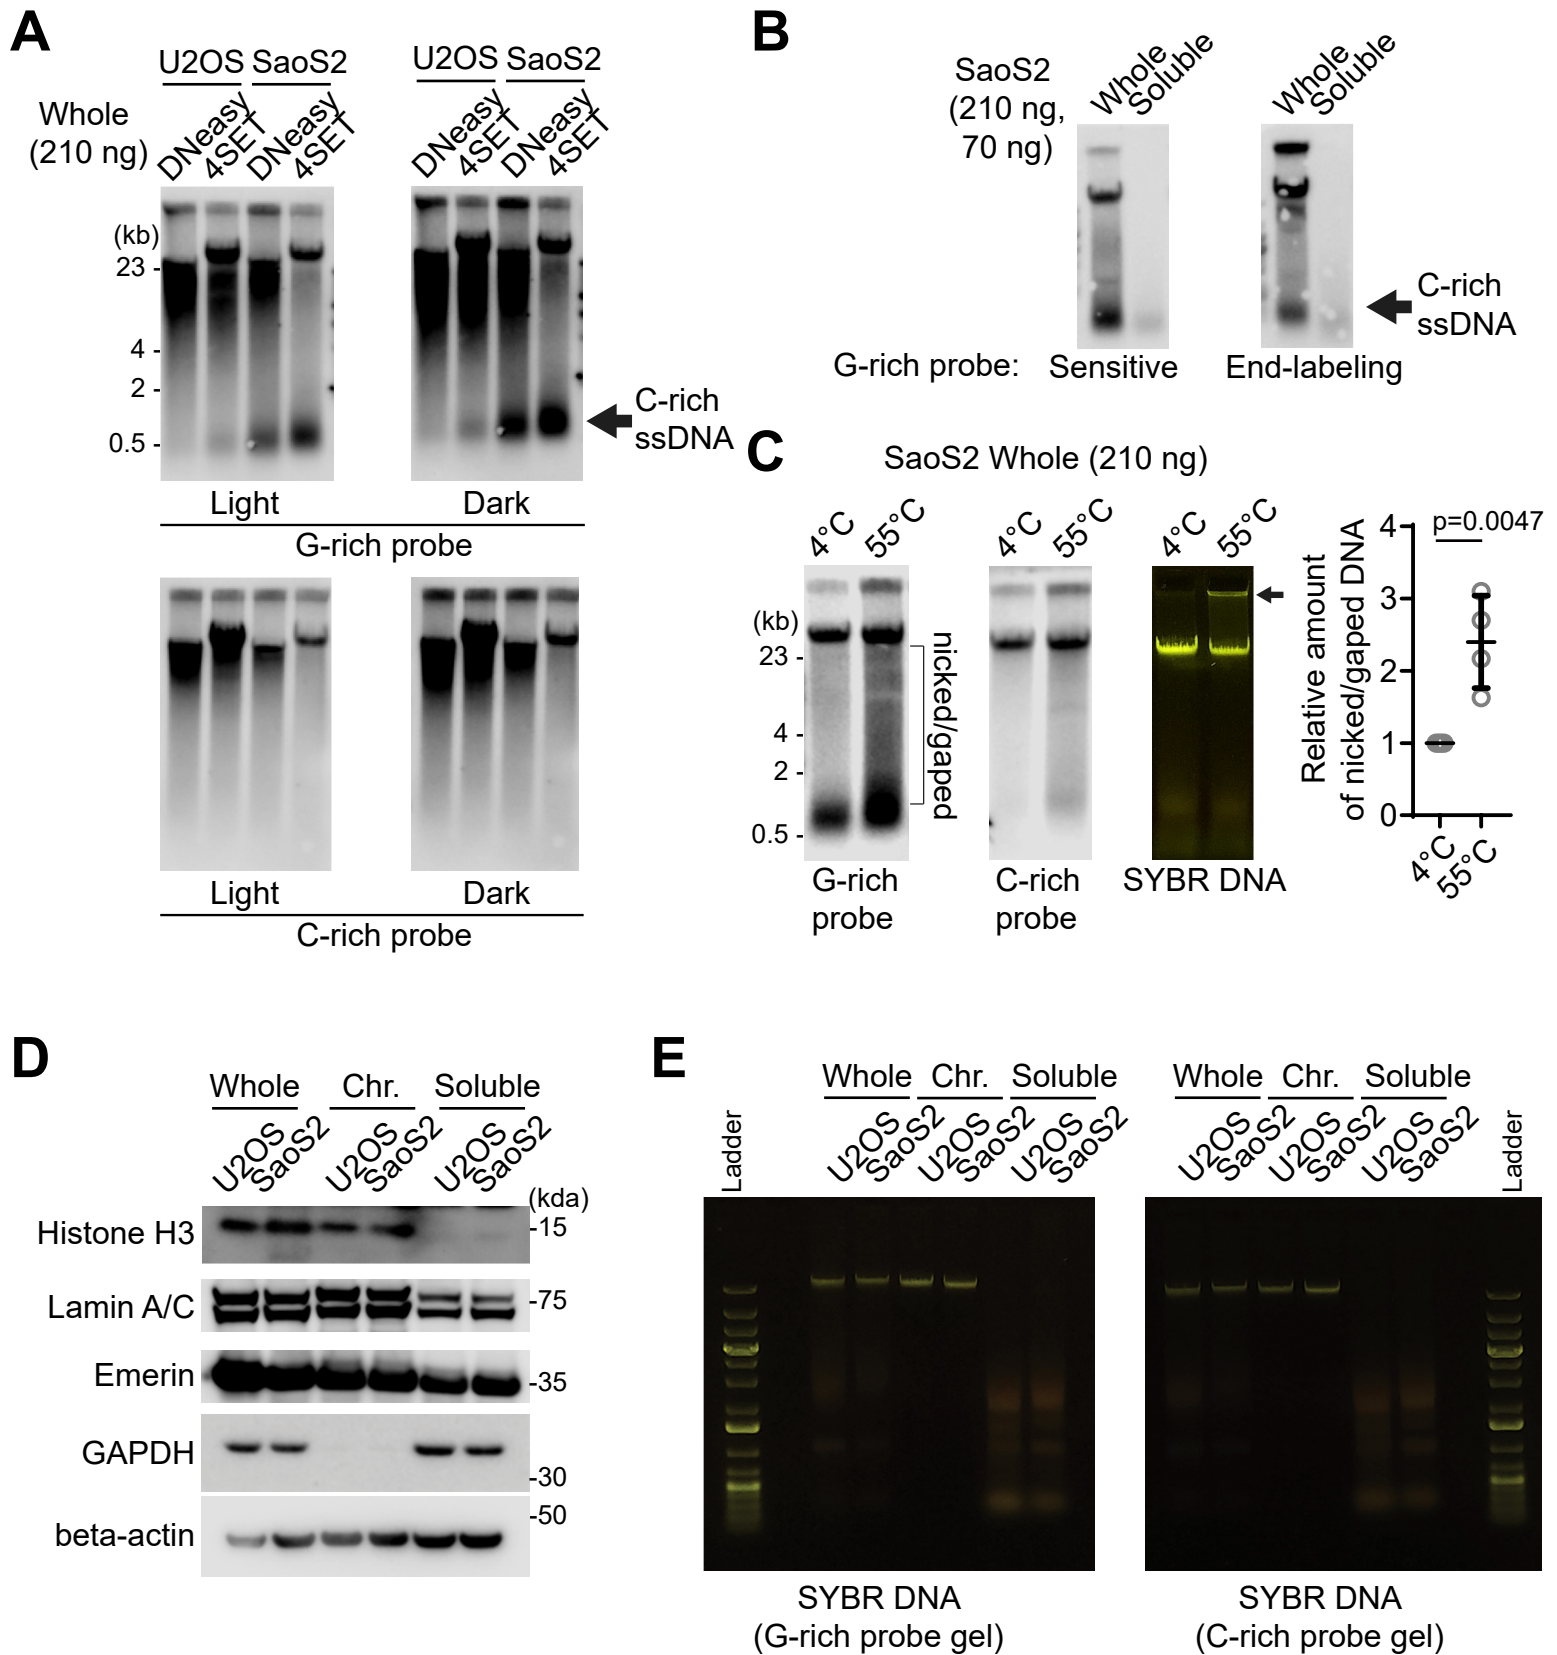

Figure S1

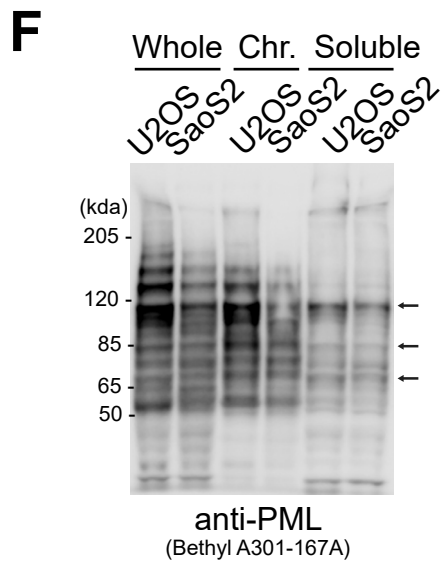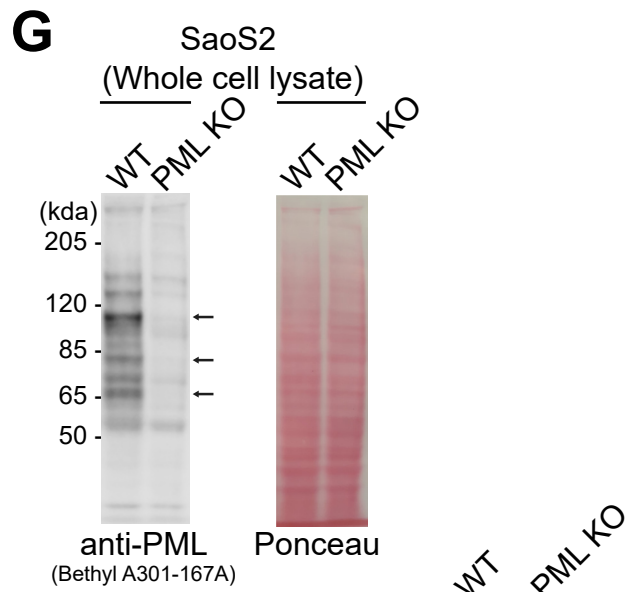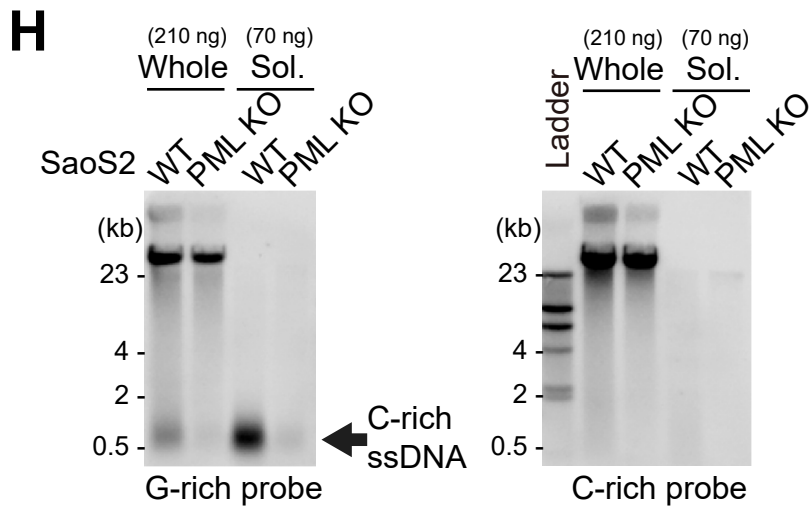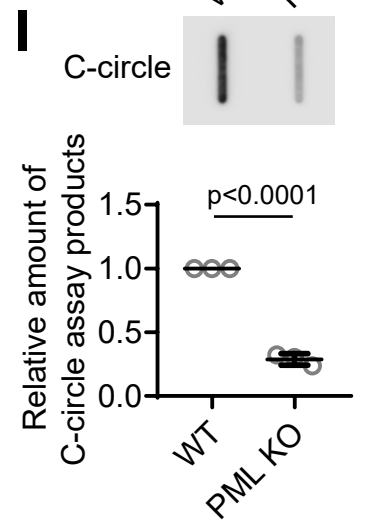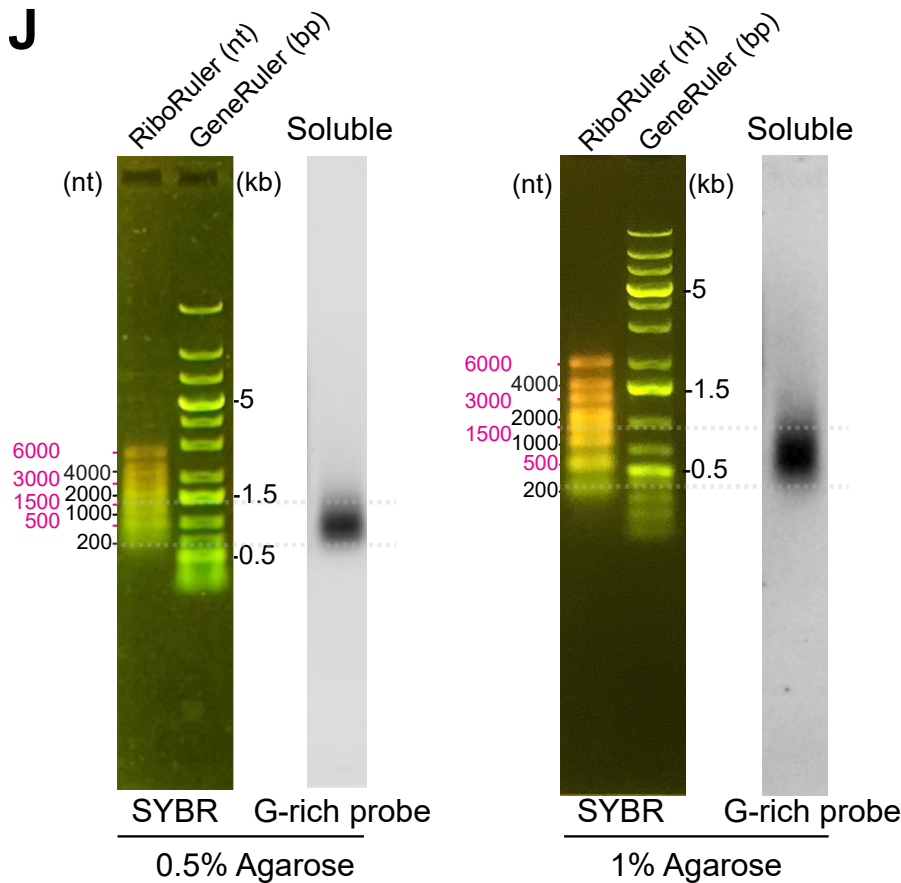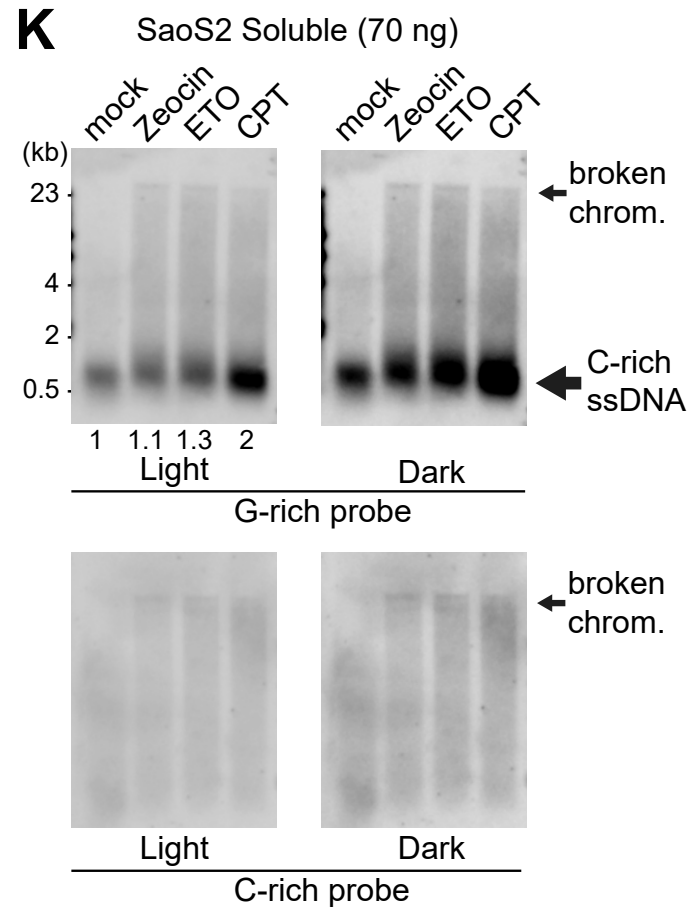

Figure S1

**L**

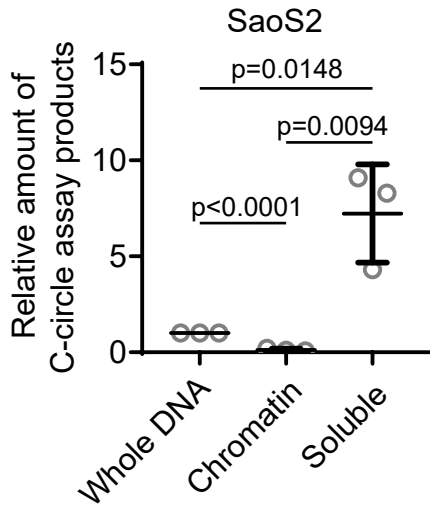

**M**

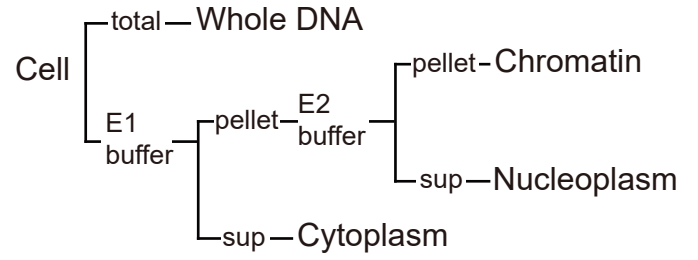

**N**

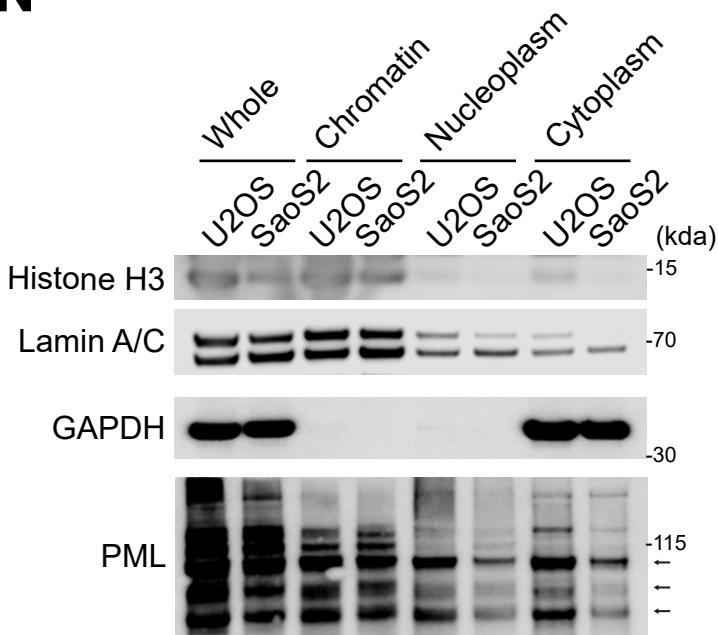

**O**

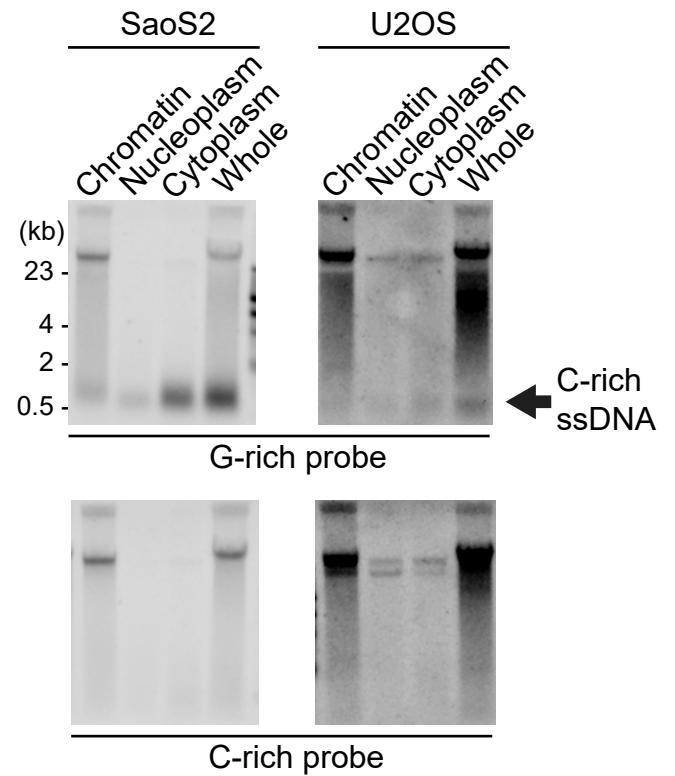

Whole - 140ng  
Chromatin&Nucleoplasm&Cytoplasm - 70ng

Figure S2

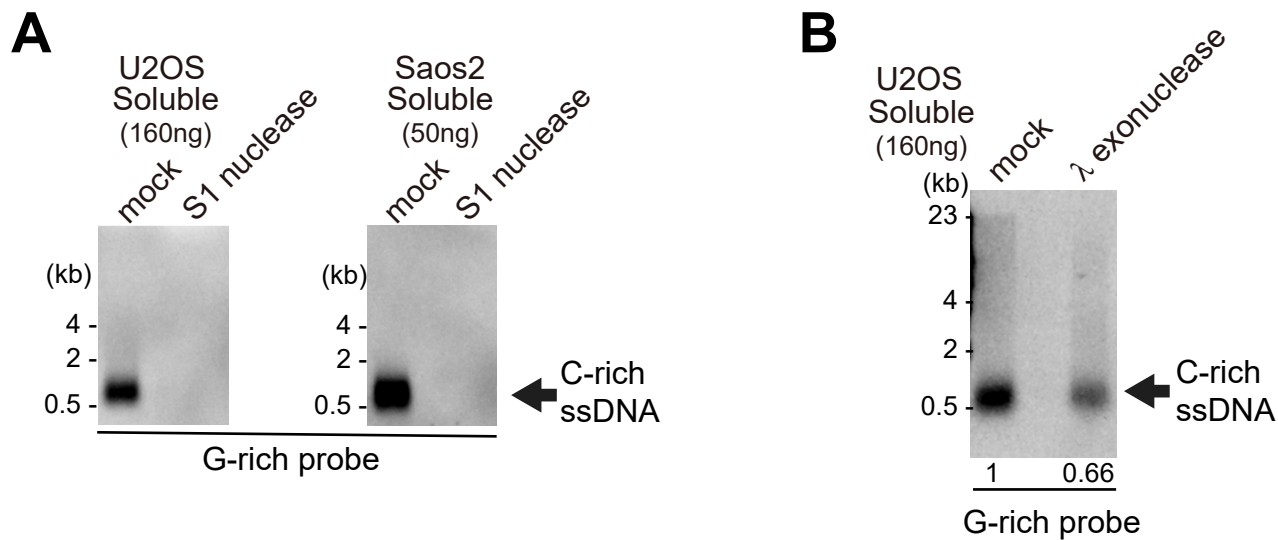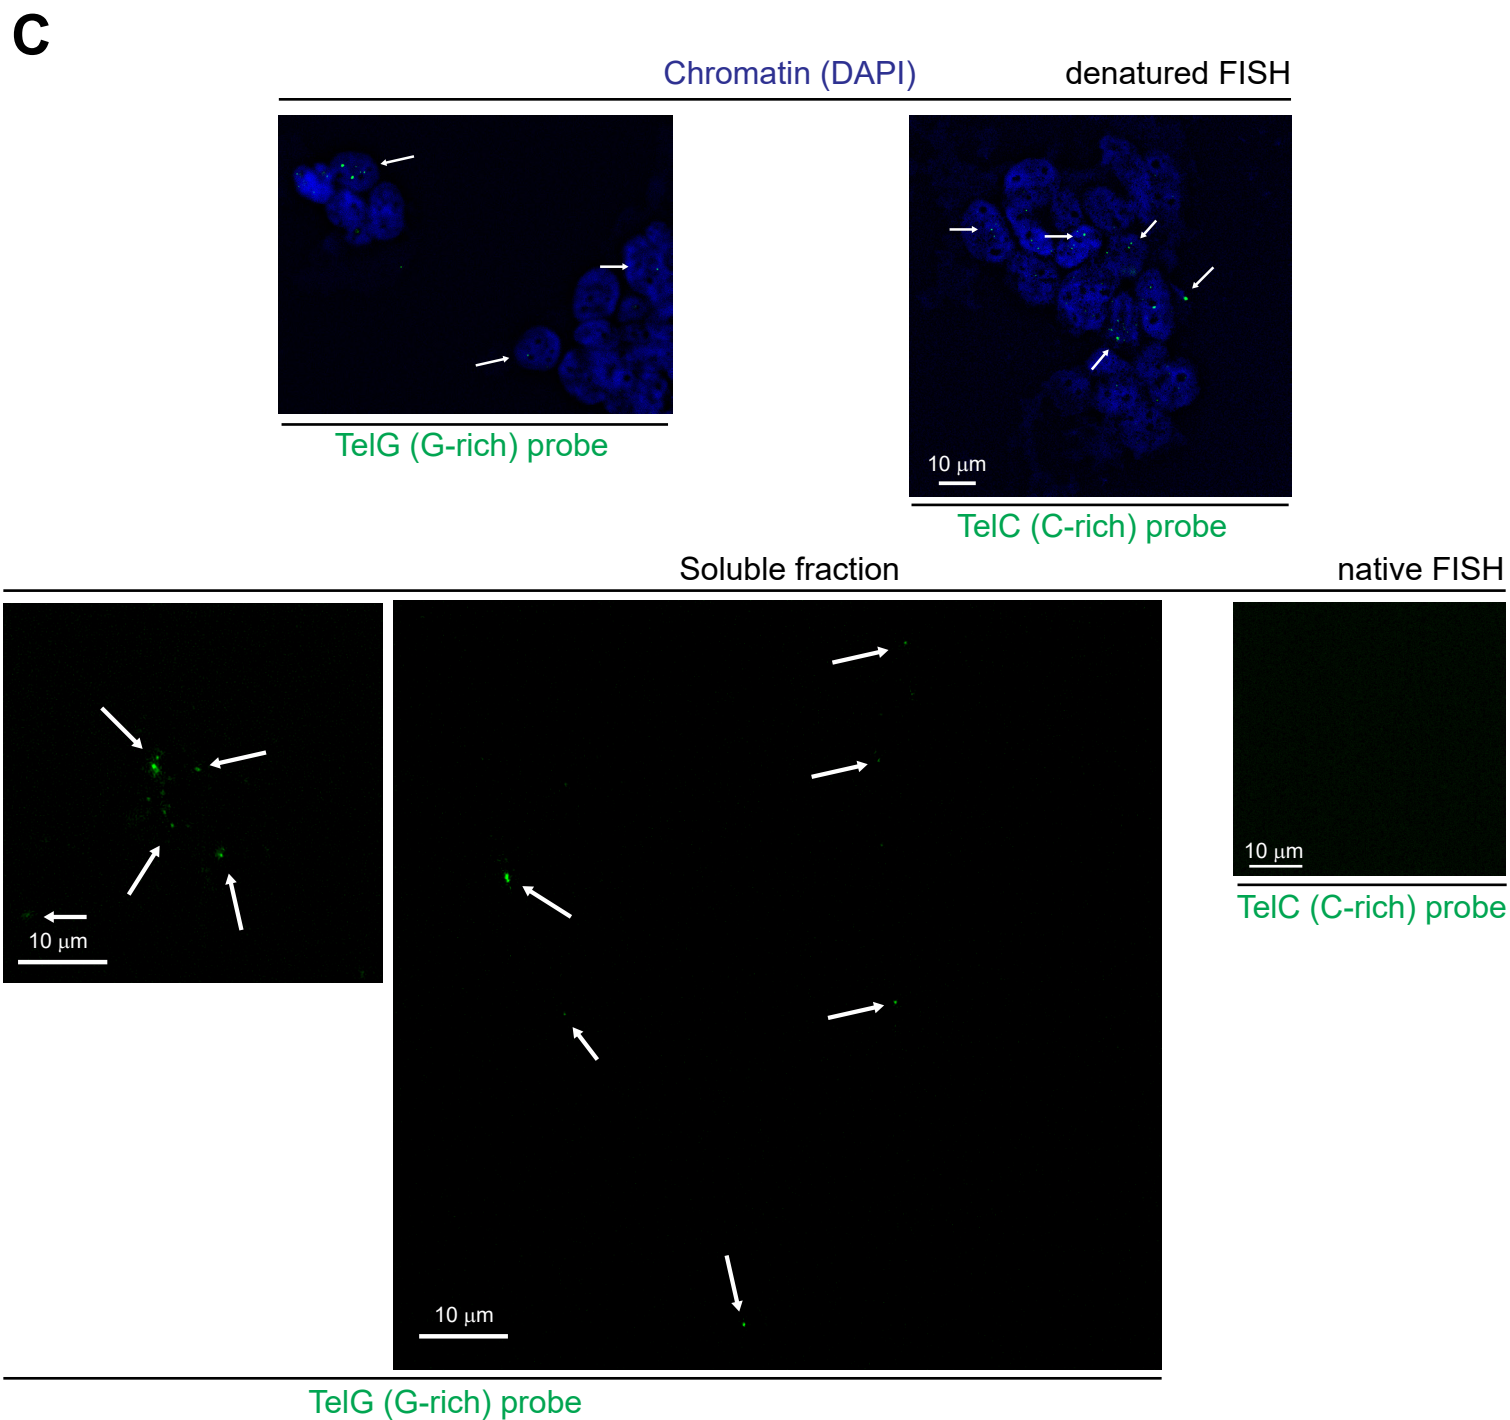

**Figure S3**

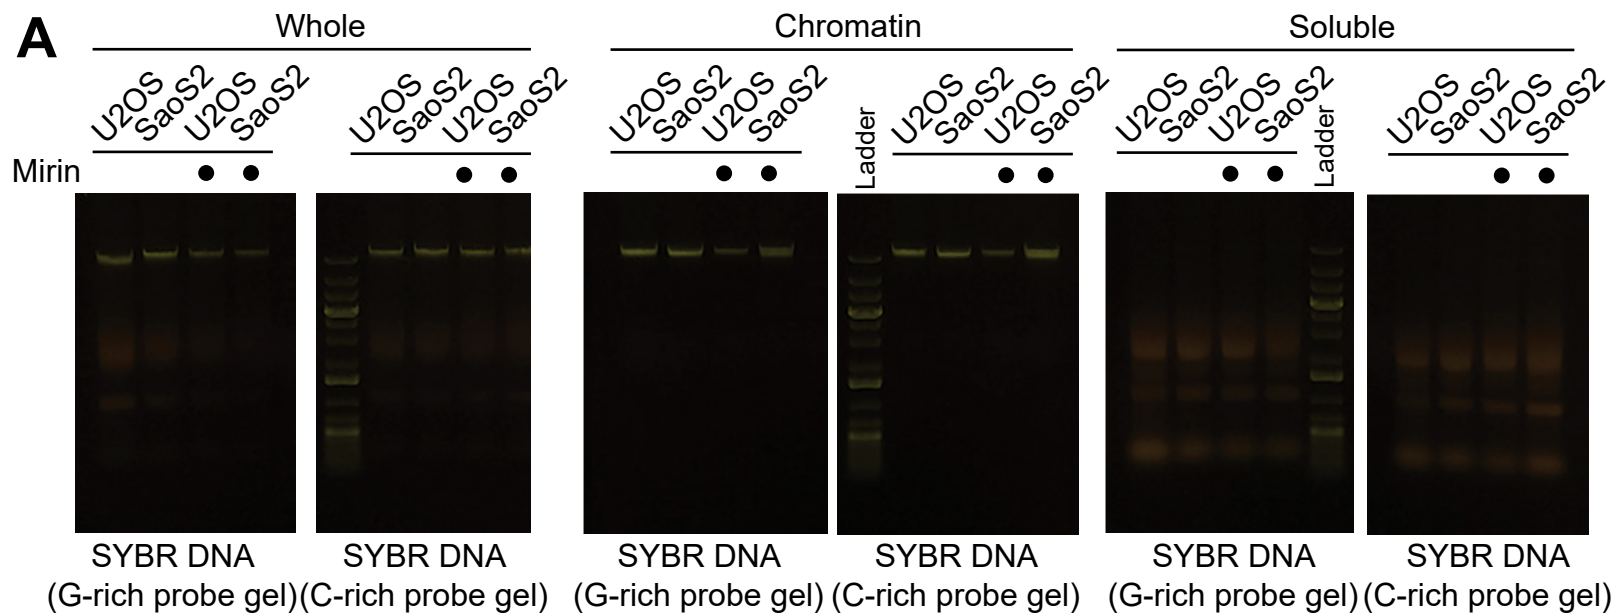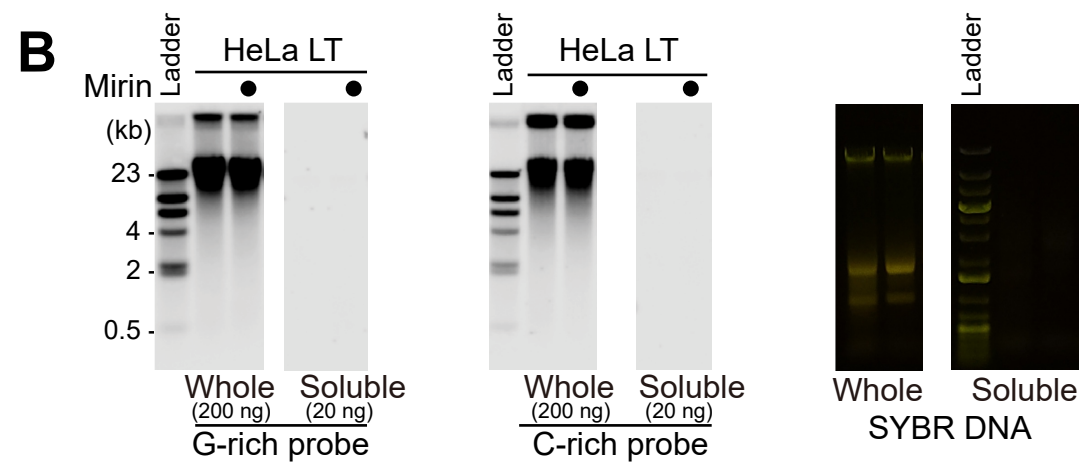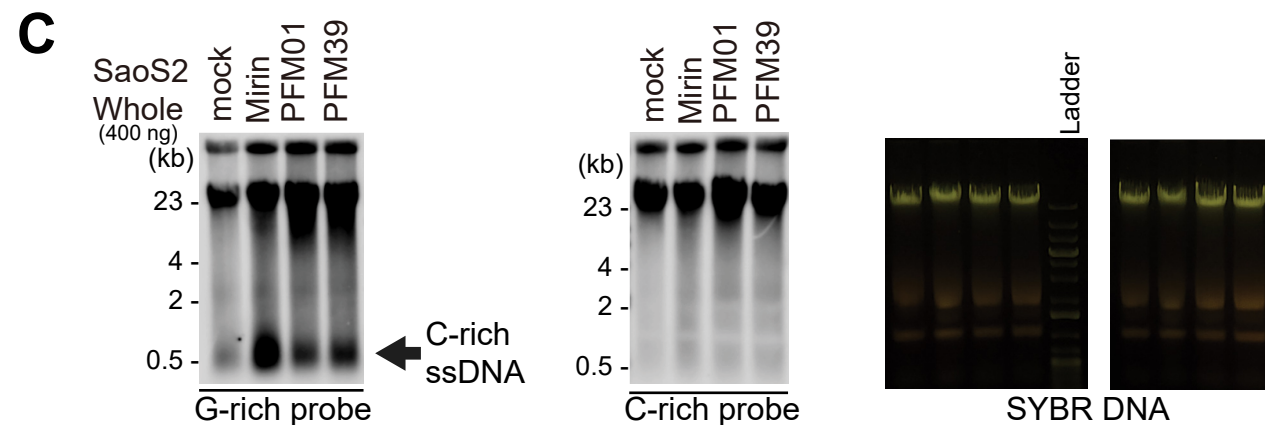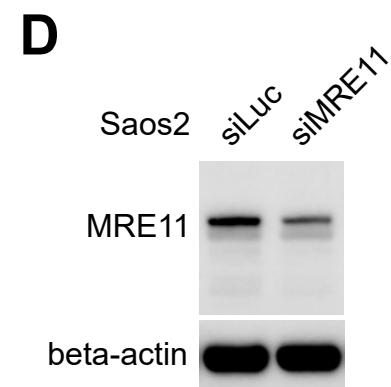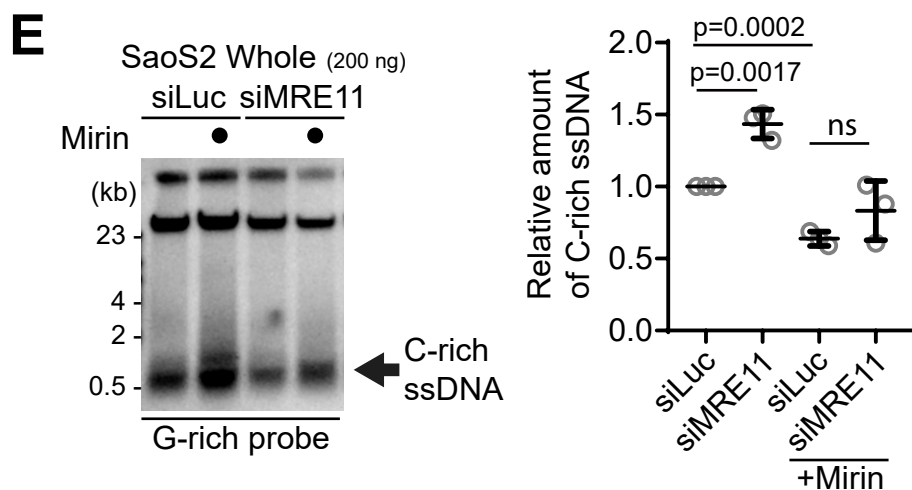

Figure S3

**F**

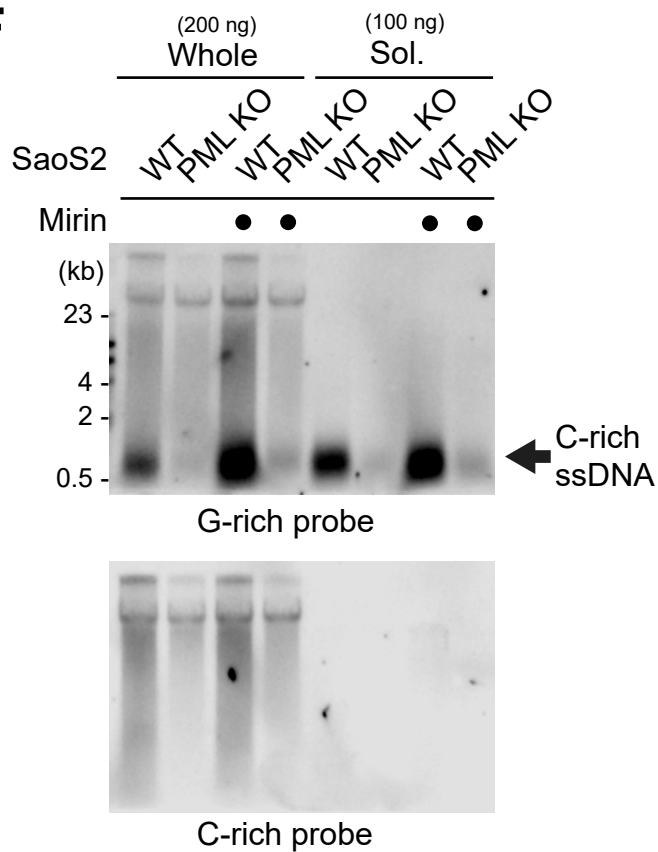

**G**

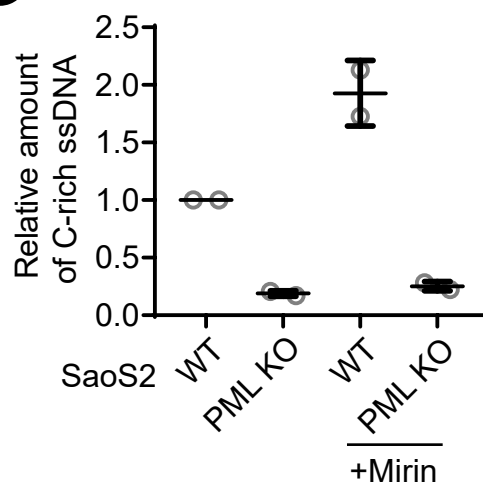

**H**

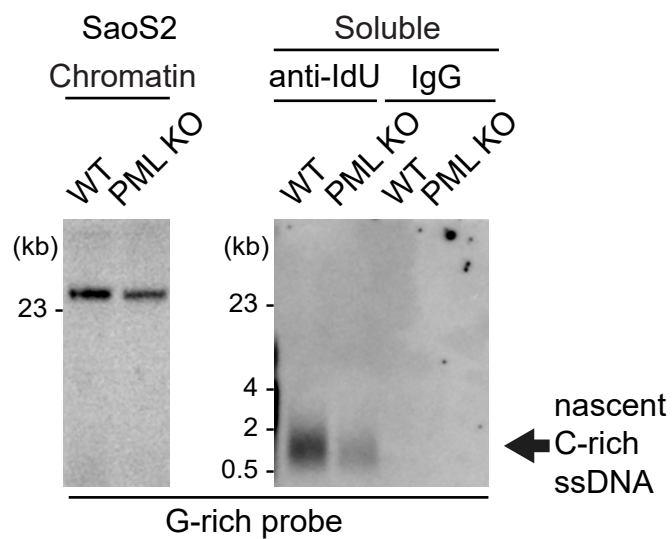

**I**

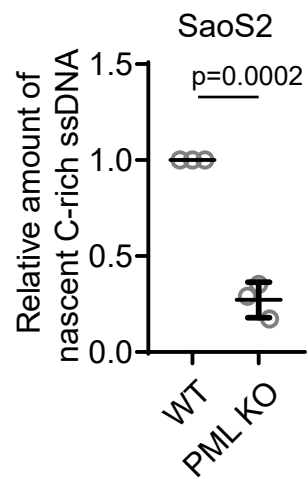



Figure S4

**A**

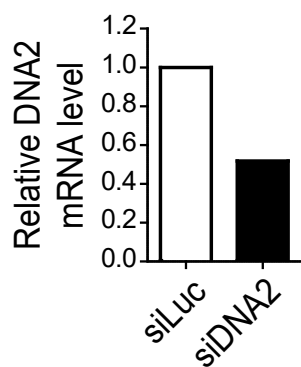

**B**

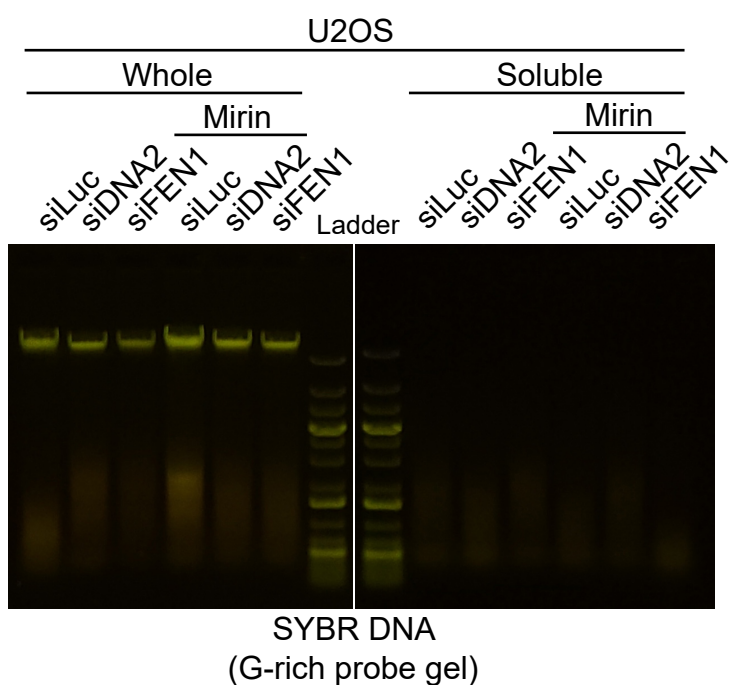

**C**

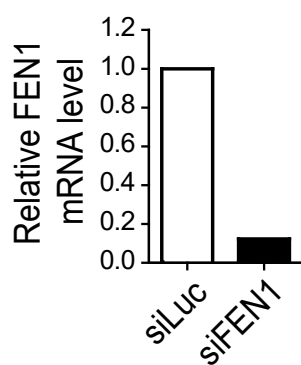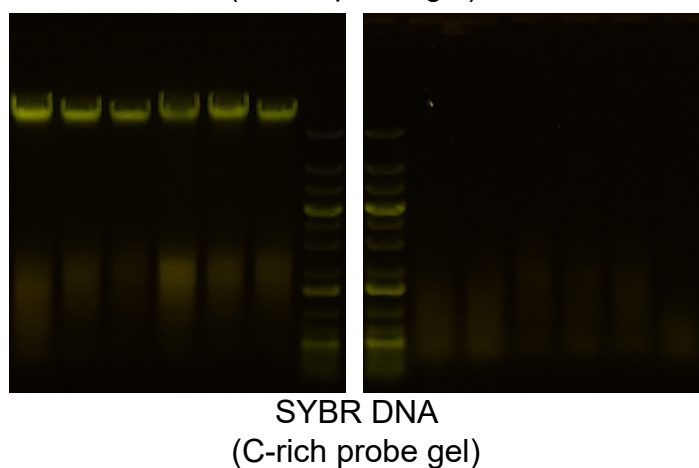

**D**

5' flap in lagging daughter strand (C-rich)

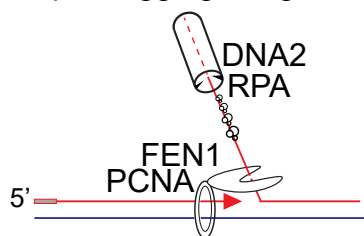

**E**

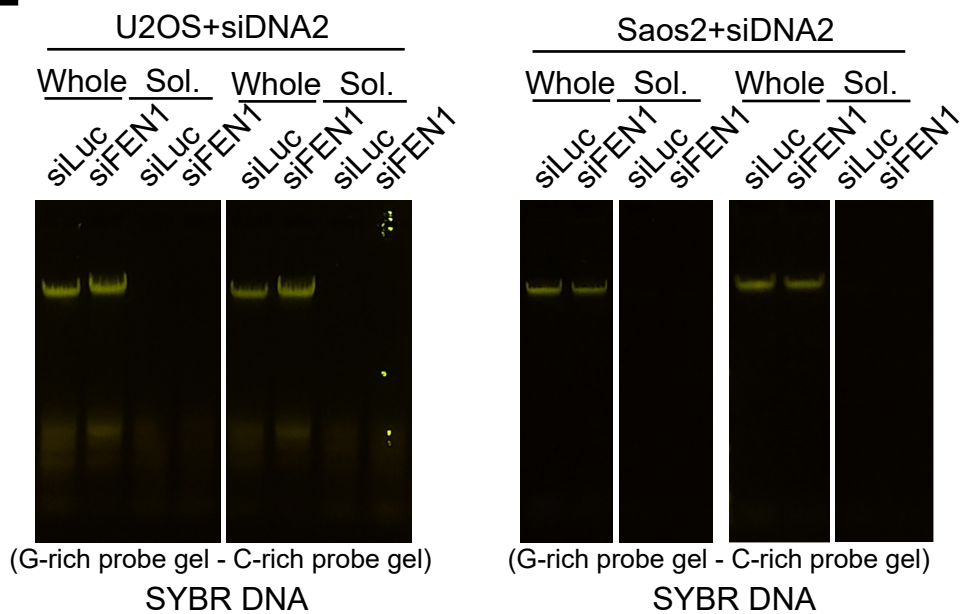

Figure S4

**F**

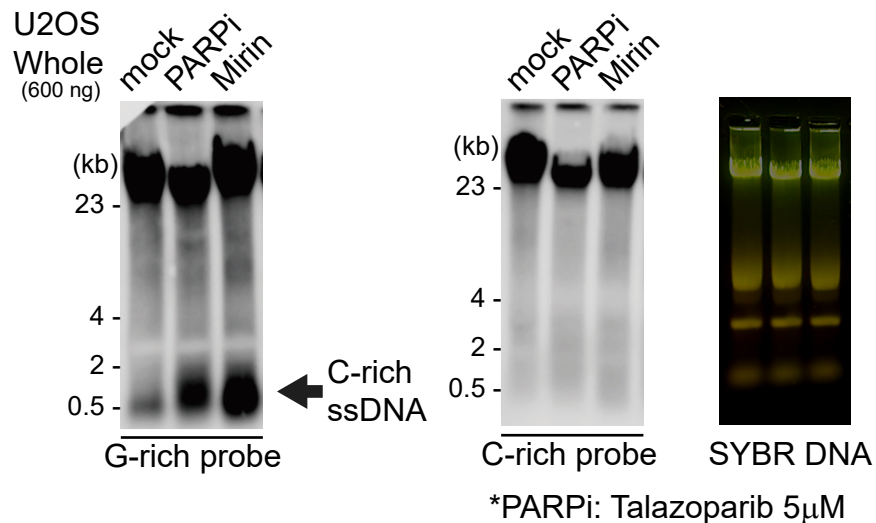

**G**

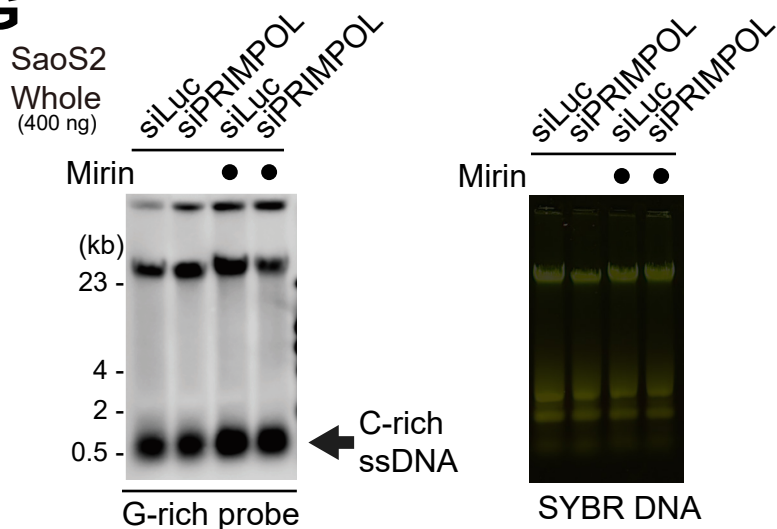

**H**

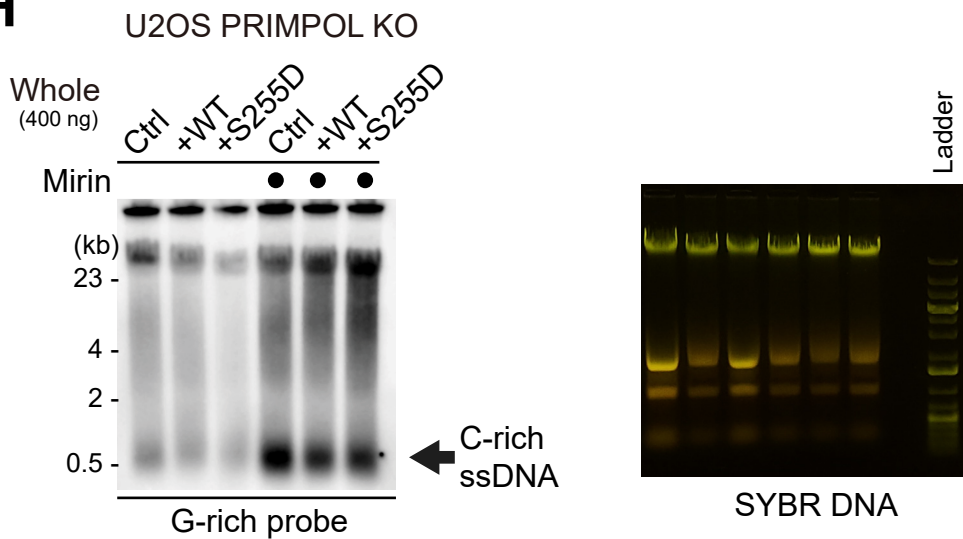



Figure S5

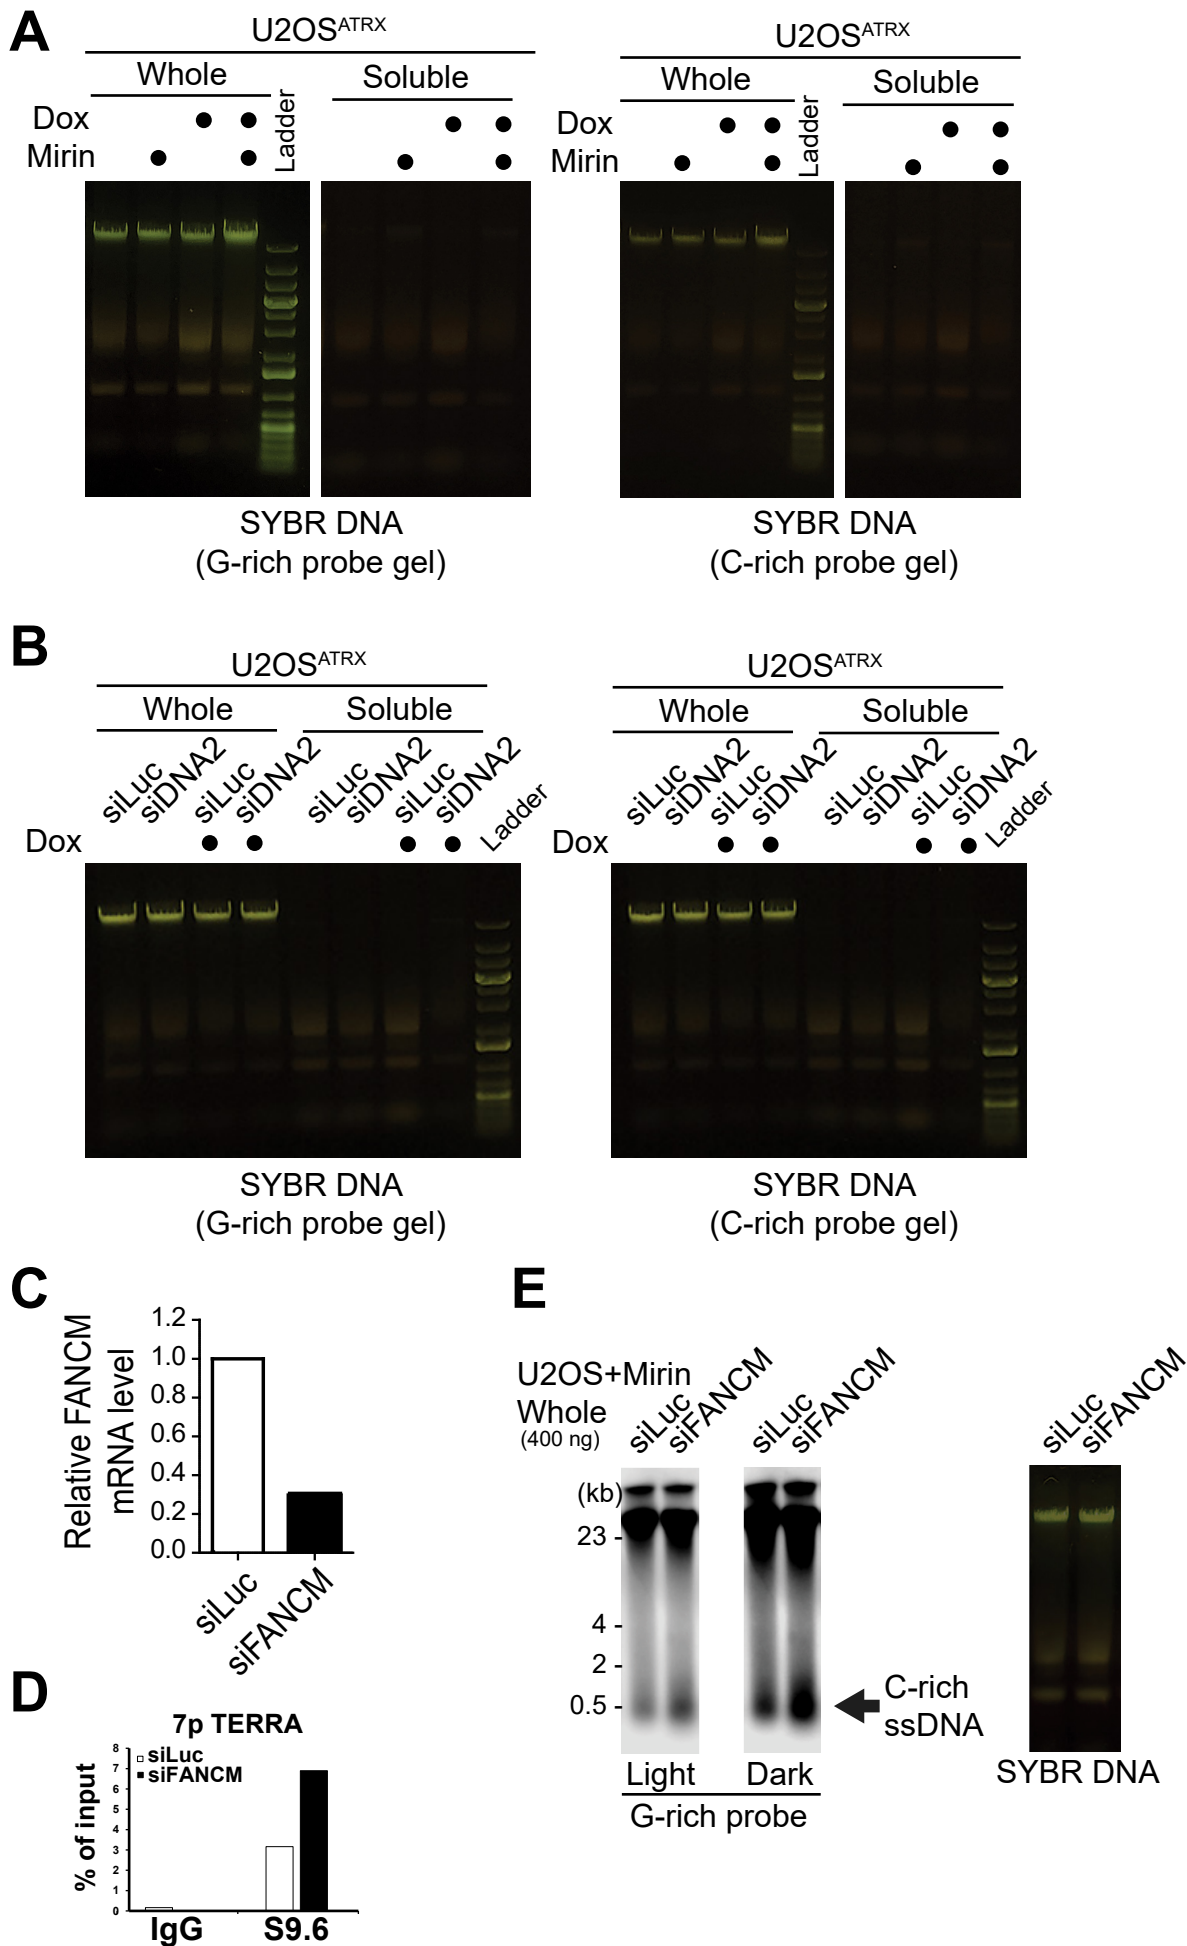

Figure S5

**F**

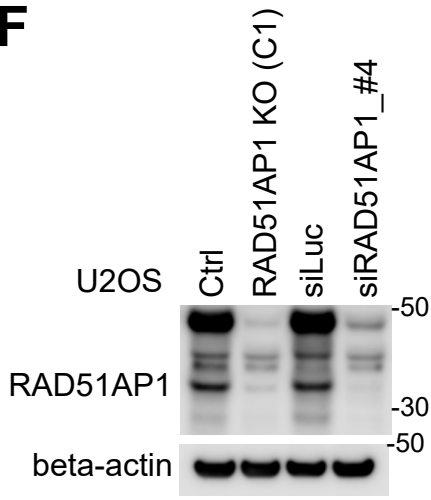

**G**

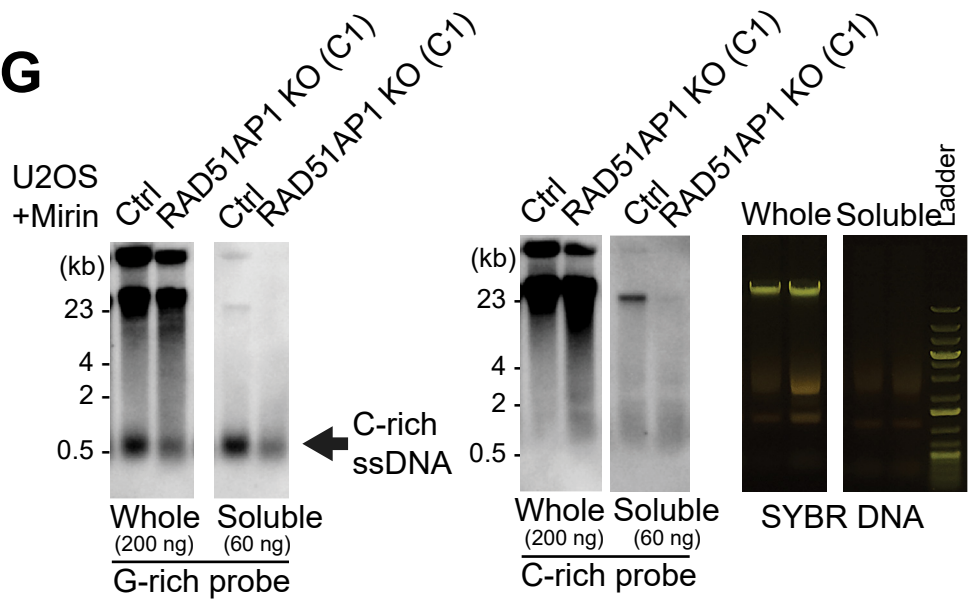

**H**

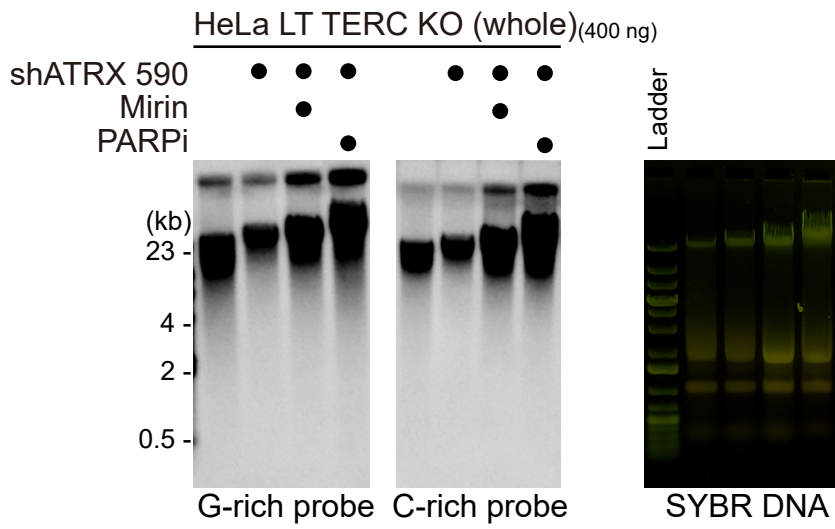

Figure S6

**A**

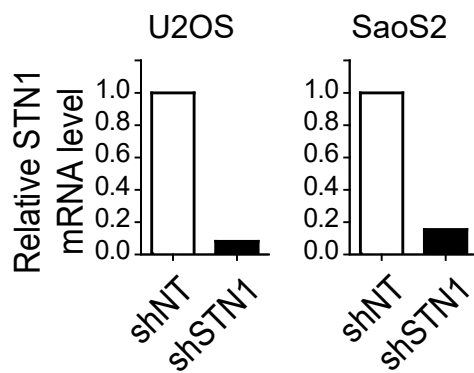

**B**

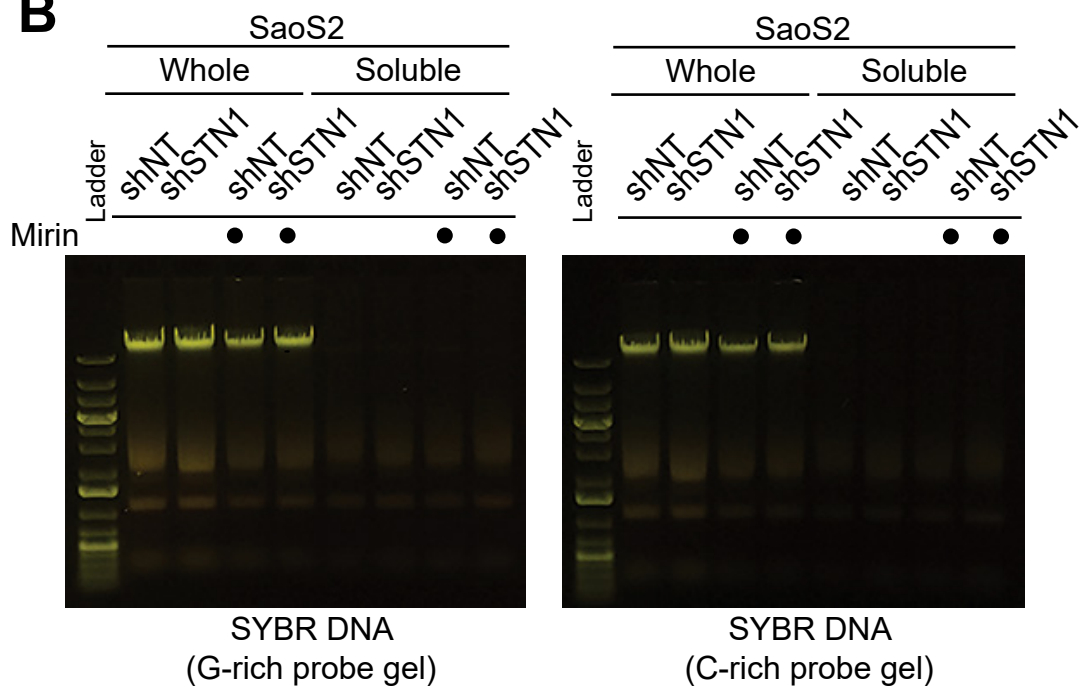

**C**

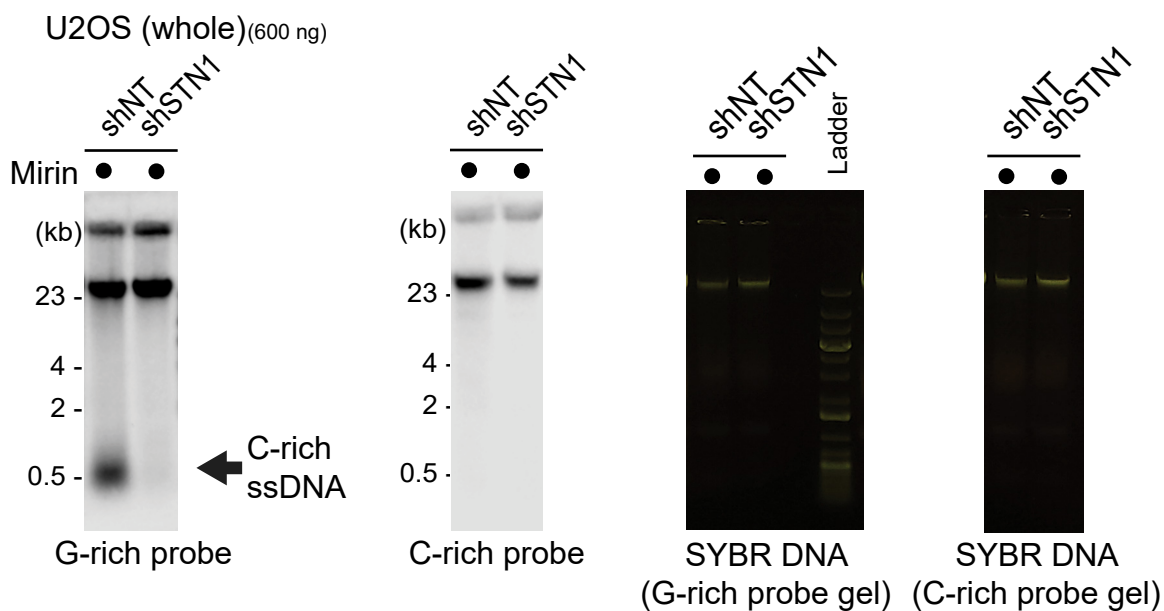

**D**

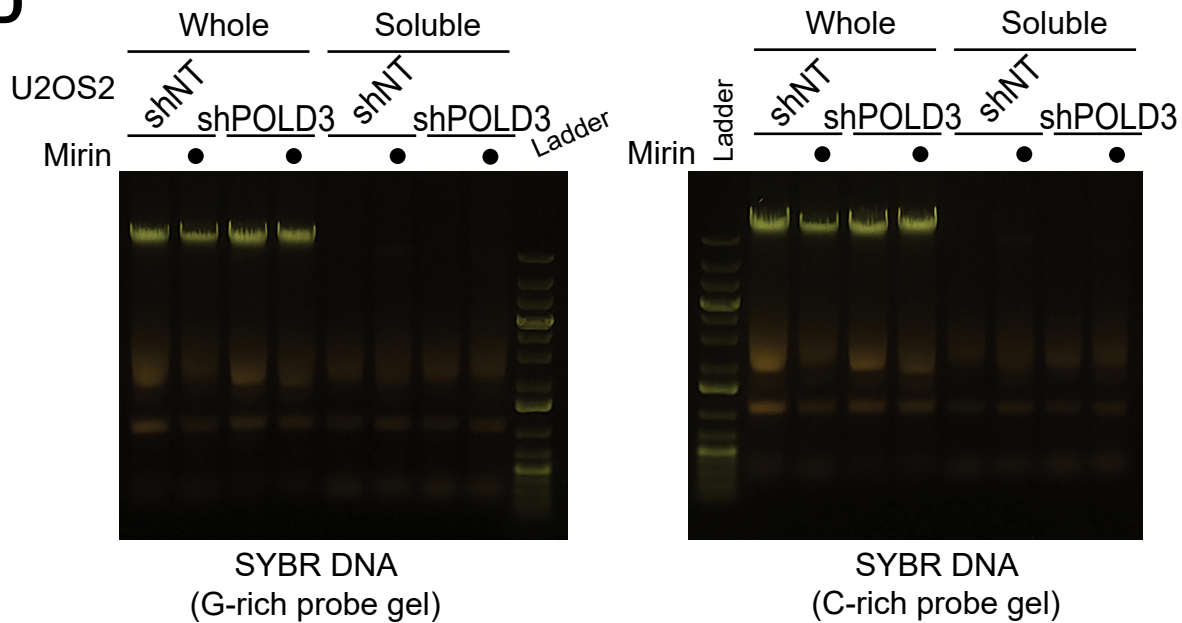

Figure S6 **E**

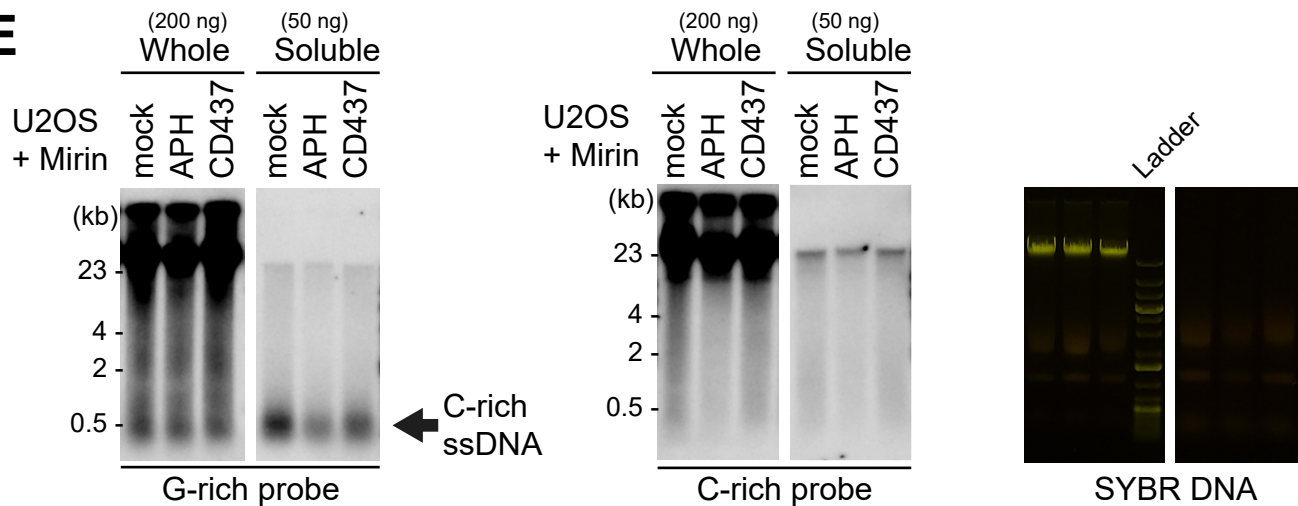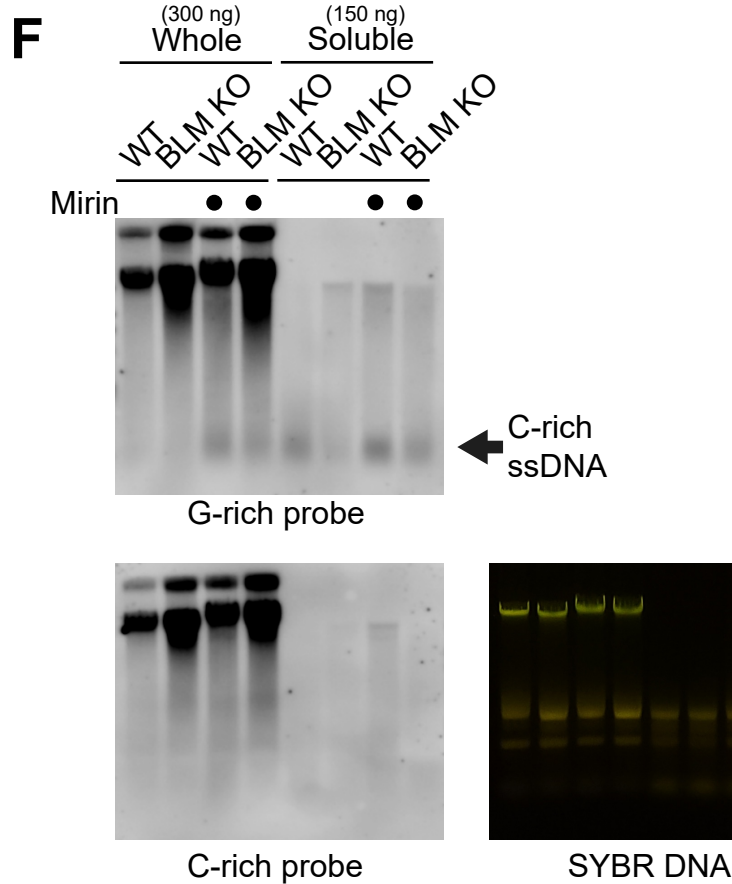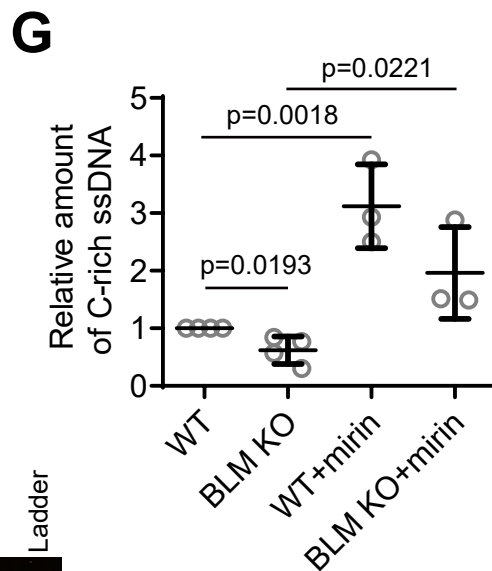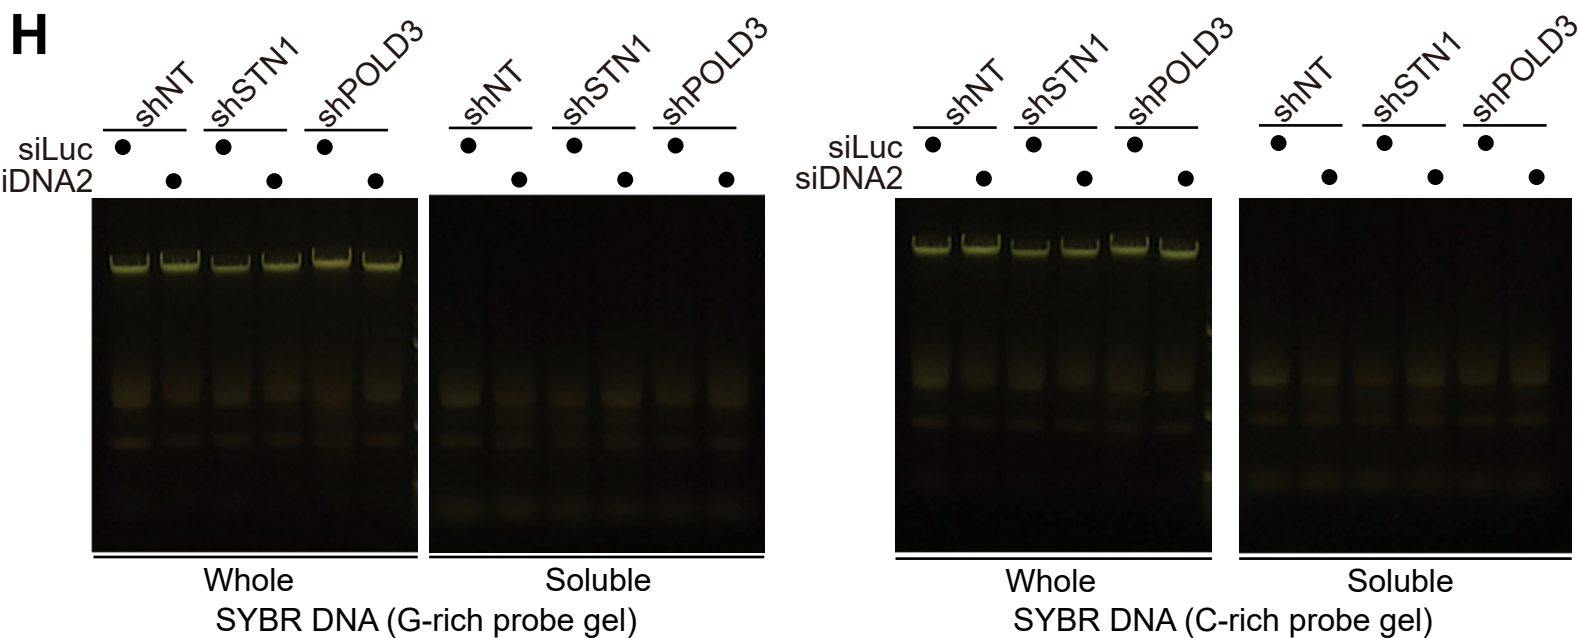

Supplement: media-1.pdf [file media-1.pdf]
